# Supplementary material
Source: Springer Nature journal article supplement (https://www.springermedizin.de/resource/supplementary/13058_2012_3150_MOESM13_ESM.pdf/9703386)

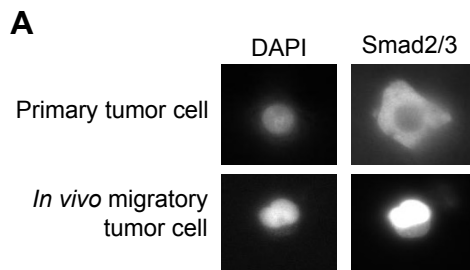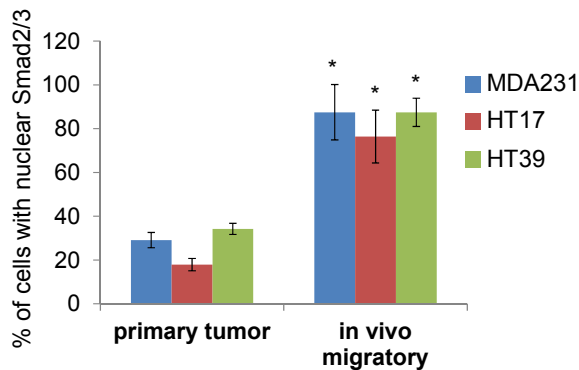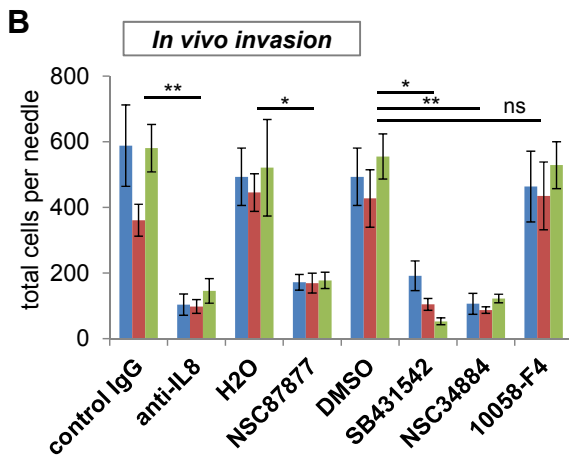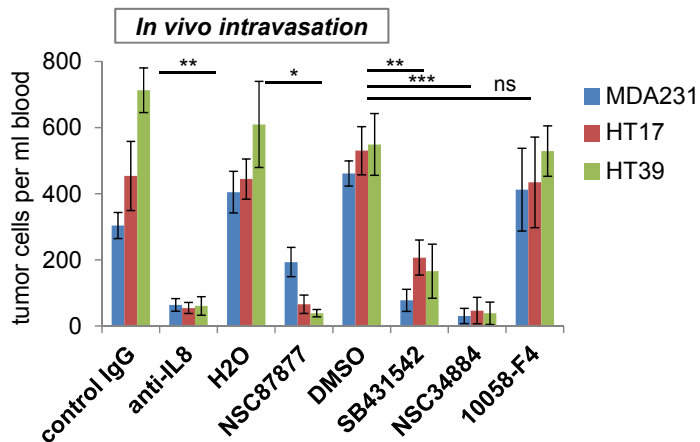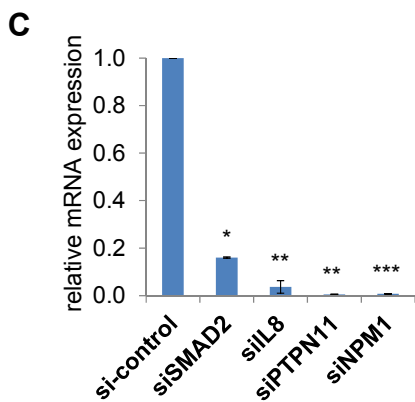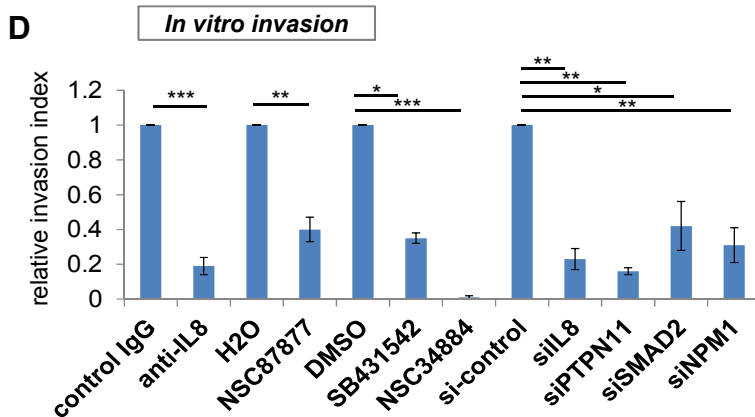

Supplement: MOESM13 [file 9703386]
